# Supplementary material
Source: ML conference proceedings conference paper supplement (https://openaccess.thecvf.com/content/ACCV2022/html/Alawode_UTB180_A_High-quality_ACCV_2022_paper.html)
Supplement: Supplementary file 1 [file Alawode_UTB180_A_High-quality_ACCV_2022_supplemental.pdf]

# Supplementary Material

## UTB180: A High-quality Benchmark for Underwater Tracking

Basit Alawode<sup>1</sup>, Yuhang Guo<sup>1</sup>, Mehnaz Umam<sup>1</sup>, Naoufel Werghi<sup>1</sup>, Jorge Dias<sup>1</sup>, Ajmal Mian<sup>2</sup>, and Sajid Javed<sup>1</sup>

<sup>1</sup>Department of Electrical Engineering and Computer Science, Khalifa University of Science and Technology, Abu Dhabi, UAE .

<sup>2</sup>The University of Western Australia, Stirling Highway, Australia.  
{100060517,sajid.javed}@ku.ac.ae

### 1 Performance Evaluation of SOTA Trackers

– **Protocol I:** Performance evaluation of 15 SOTA pre-trained trackers (Fig. 1-2).

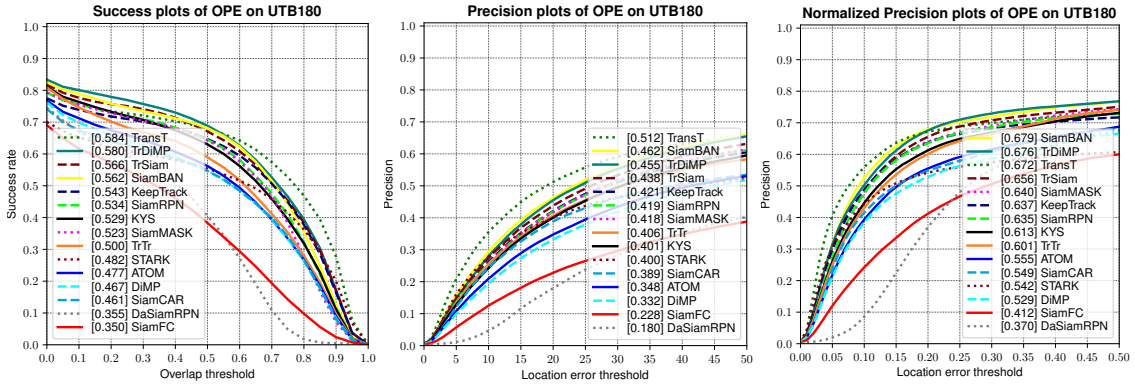

Fig. 1: Results of the pre-trained trackers on our proposed UTB180 dataset. From left to right, success, precision, and normalized precision plots are shown.

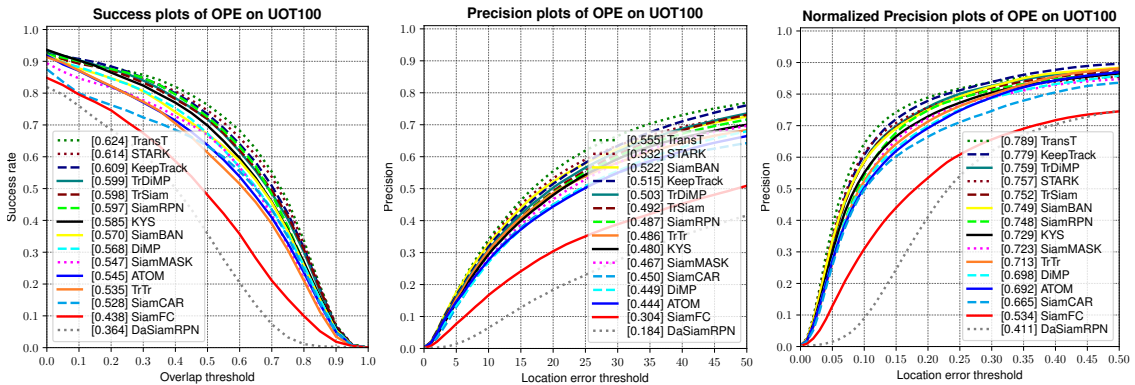

Fig. 2: Results of the pre-trained trackers on UOT100 dataset. From left to right, success, precision, and normalized precision plots are shown.

- **Protocol II:** Performance evaluation of representative SOTA trackers fine-tuned on our UTB180 dataset (Fig. 3).

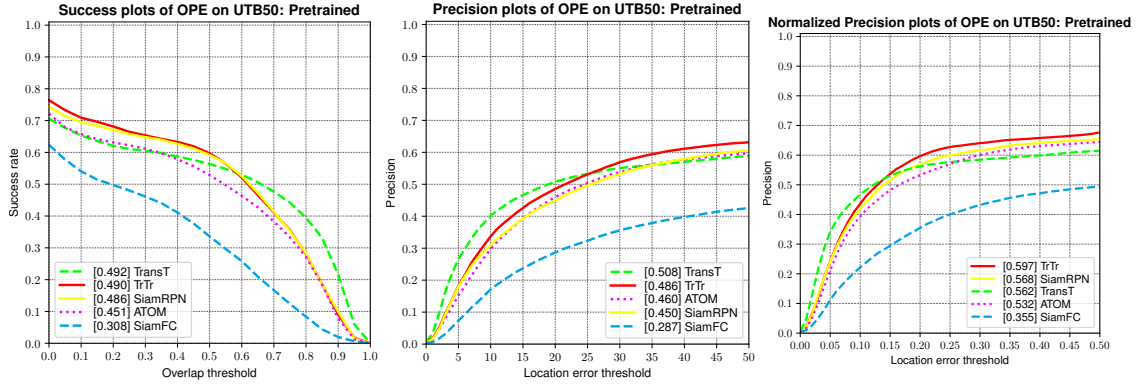

Fig. 3: Results of the pre-trained trackers using testing split of our proposed UTB180 dataset. From left to right, success, precision, and normalized precision plots are shown.

- **Protocol II: Fine-tuned trackers results** (Fig. 4).

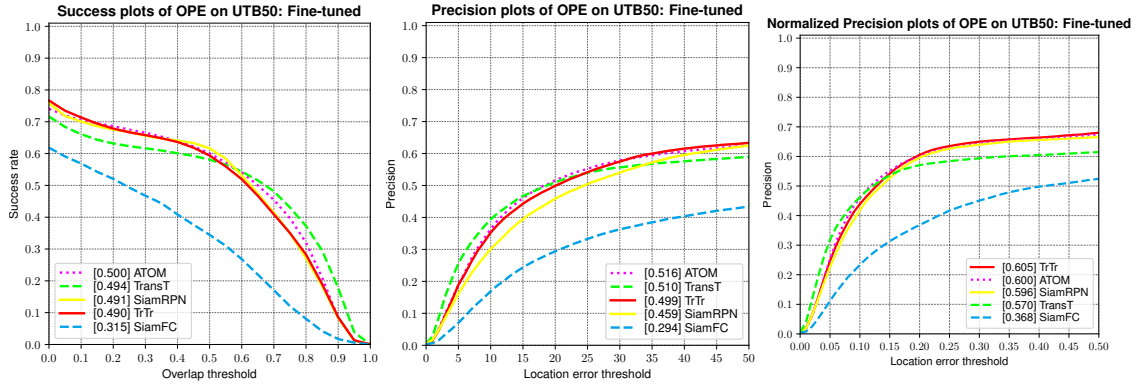

Fig. 4: Results of the fine-tuned trackers using our proposed UTB180 dataset. From left to right, success, precision, and normalized precision plots are shown.

## 2 Attribute-wise performance comparison of SOTA trackers

Here, we provide attribute-wise performance evaluations for all 15 pre-trained trackers on UTB180 dataset.

1. Unclear Water (UW) (Fig. 5).
2. Target Scale Variation (SV) (Fig. 6).
3. Out-of-View (OV) (Fig. 7)
4. Partial Occlusion (PO). (Fig. 8).
5. Full Occlusion (FO) (Fig. 9)
6. Deformation (DF) (Fig. 10)
7. Low Resolution (LR) (Fig. 11).

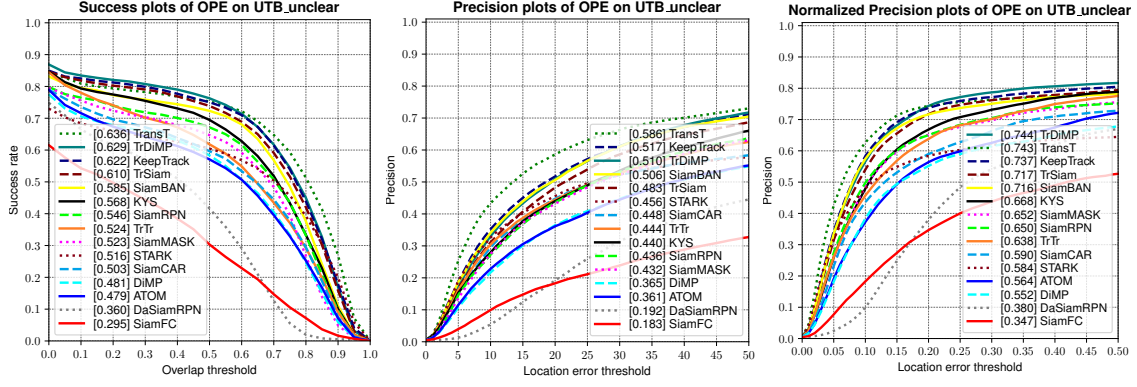

Fig. 5: Unclear Water (UW) tracking attribute. Results of the pre-trained trackers on our proposed dataset. From left to right, success, precision, and normalized precision plots are shown.

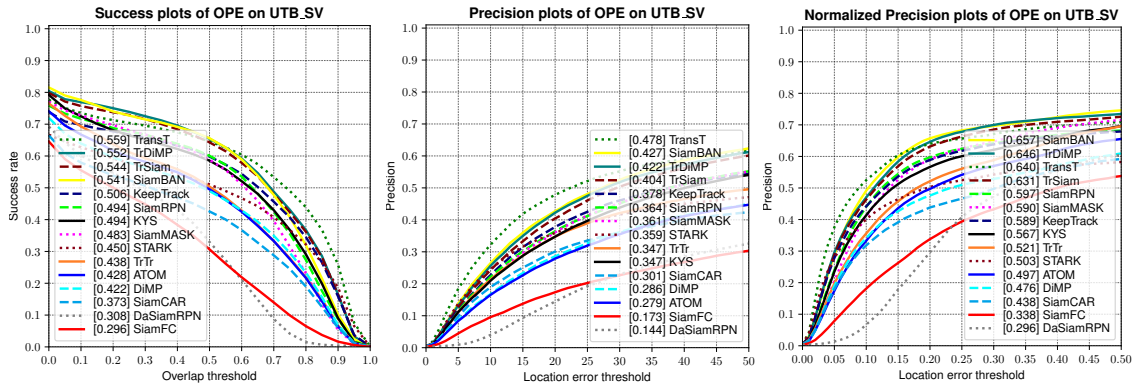

Fig. 6: Target Scale Variation (SV) challenge. Results of the pre-trained trackers on our proposed dataset. From left to right, success, precision, and normalized precision plots are shown.

8. **Fast Motion (FM)** (Fig. 12)
9. **Motion Blur (MB)** (Fig. 13)
10. **Similar Objects (SO)** (Fig. 14).

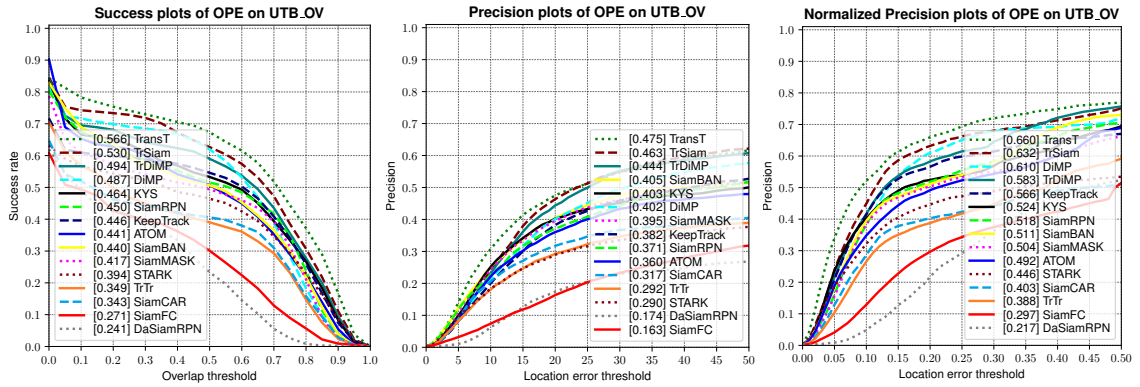

Fig. 7: Target Out-of-View (OV) challenge. Results of the pre-trained trackers on our proposed dataset. From left to right, success, precision, and normalized precision plots are shown.

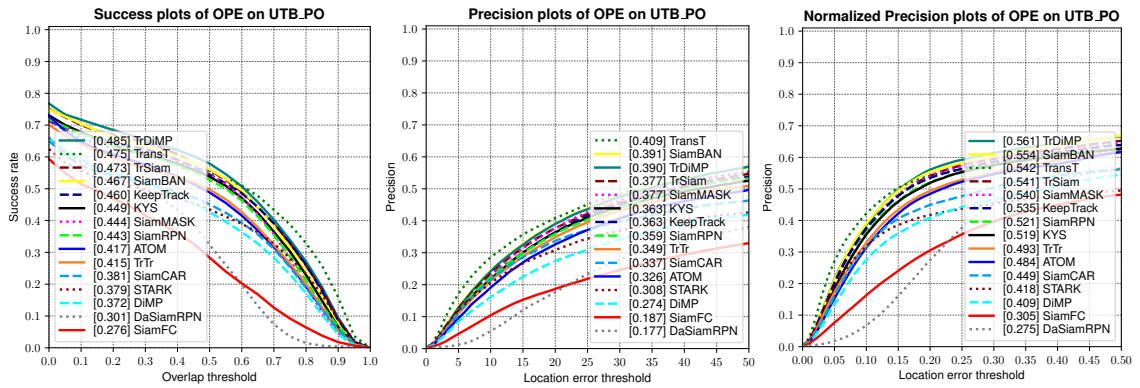

Fig. 8: Target Partial Occlusion (PO) challenge. Results of the pre-trained trackers on our proposed dataset. From left to right, success, precision, and normalized precision plots are shown.

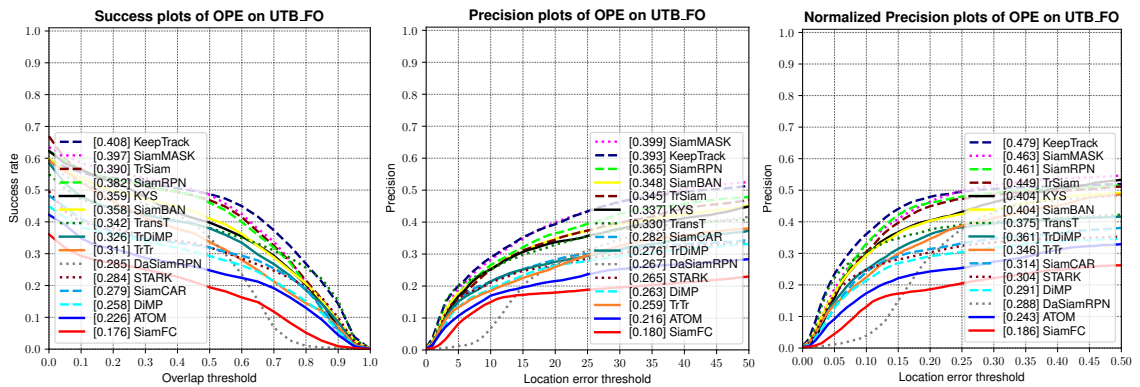

Fig. 9: Target Full Occlusion (FO) challenge. Results of the pre-trained trackers on our proposed dataset. From left to right, success, precision, and normalized precision plots are shown.



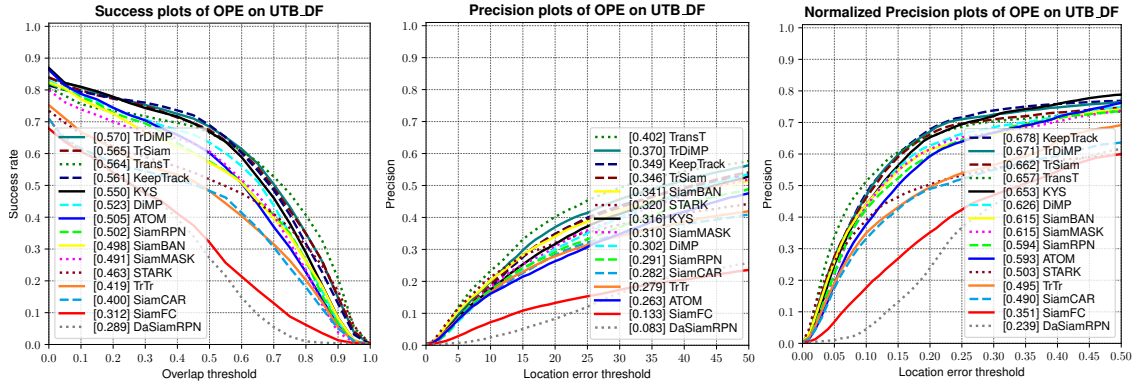

Fig. 10: Target Deformation (DF) challenge. Results of the pre-trained trackers on our proposed dataset. From left to right, success, precision, and normalized precision plots are shown.

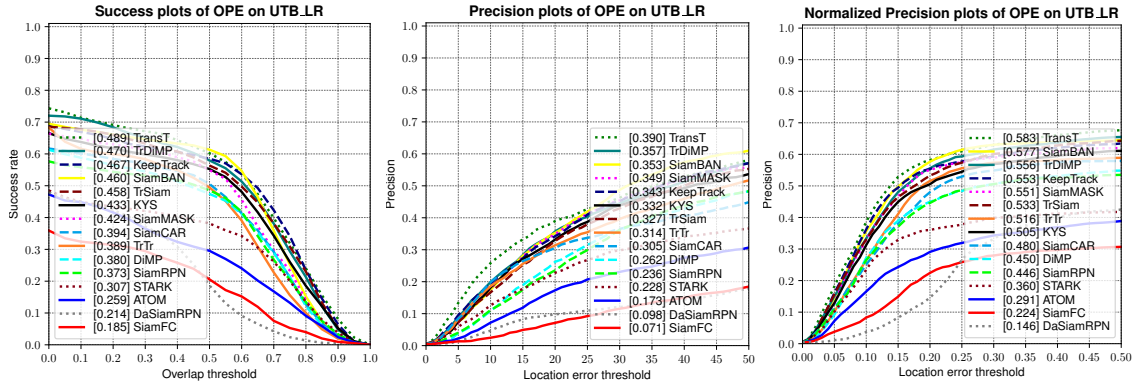

Fig. 11: Target Low Resolution (LR) challenge. Results of the pre-trained trackers on our proposed dataset. From left to right, success, precision, and normalized precision plots are shown.

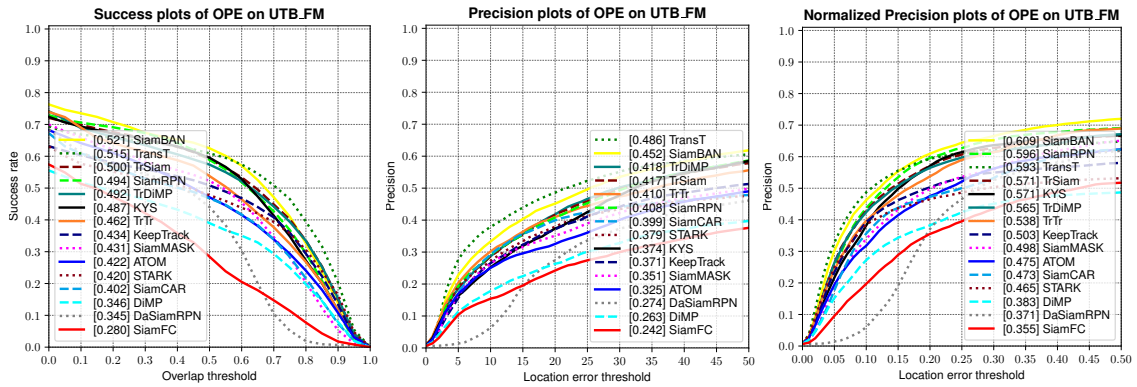

Fig. 12: Target Fast Motion (FM) challenge. Results of the pre-trained trackers on our proposed dataset. From left to right, success, precision, and normalized precision plots are shown.

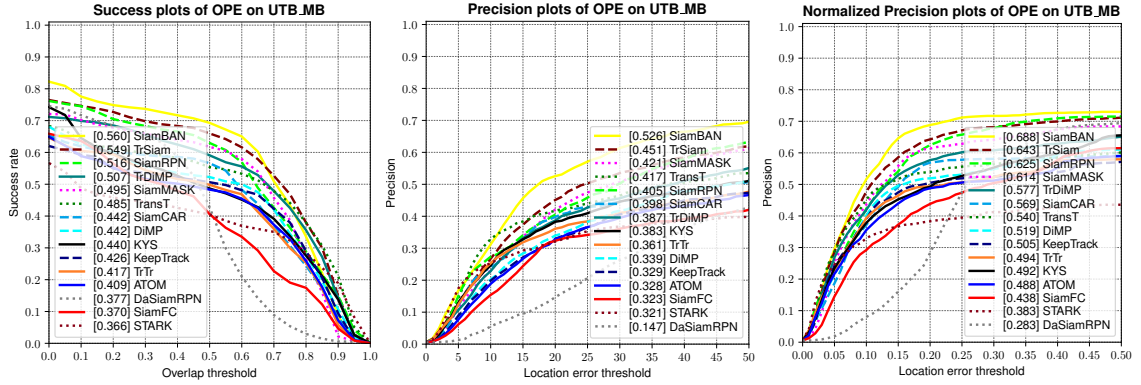

Fig. 13: Target Motion Blur (MB) challenge. Results of the pre-trained trackers on our proposed dataset. From left to right, success, precision, and normalized precision plots are shown

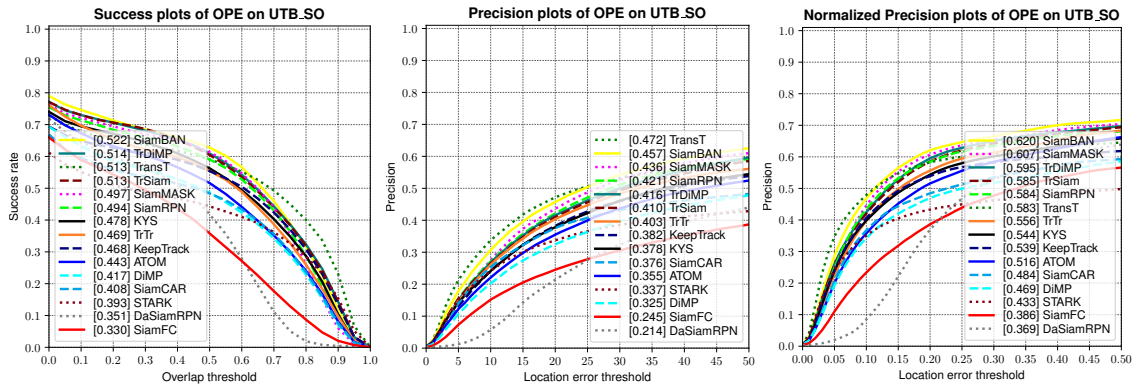

Fig. 14: Target Similar Objects (SO) challenge. Results of the pre-trained trackers on our proposed dataset. From left to right, success, precision, and normalized precision plots are shown
